1 ***Chlamydomonas reinhardtii* Tubulin-Gene Disruptants for Efficient Isolation of**  
2 **Strains Bearing Novel Tubulin Mutations**

3

4 **Takako Kato-Minoura<sup>1,2\*</sup>, Yutaro Ogiwara<sup>2</sup>, Takashi Yamano<sup>3</sup>, Hideya Fukuzawa<sup>3</sup>,**  
5 **and Ritsu Kamiya<sup>1</sup>**

6

7 <sup>1</sup>Department of Biological Sciences, Faculty of Science and Engineering, Chuo University,  
8 1-13-27 Kasuga, Bunkyo-ku, Tokyo 112-8551, Japan

9 <sup>2</sup>Biological Science Course, Graduate School of Science and Engineering, Chuo University,  
10 1-13-27 Kasuga, Bunkyo-ku, Tokyo 112-8551, Japan

11 <sup>3</sup>Graduate School of Biostudies, Kyoto University, Kyoto 606-8502, Japan

12

13

14 Running title: Tubulin mutants of *Chlamydomonas*

15

16

17 \*Corresponding author.

18 E-Mail: minoura@bio.chuo-u.ac.jp

19

20 **ABSTRACT**

21 The single-cell green alga *Chlamydomonas reinhardtii* possesses two  $\alpha$ -tubulin genes (*tua1*  
22 and *tua2*) and two  $\beta$ -tubulin genes (*tub1* and *tub2*), with the two genes in each pair  
23 encoding identical amino acid sequences. Here, we used an *aphVIII* gene cassette  
24 insertional library to establish eight disruptants with defective *tua2*, *tub1*, or *tub2*  
25 expression. None of the disruptants exhibited apparent defects in cell growth, flagellar  
26 length, or flagellar regeneration after amputation. Because few tubulin mutants of *C.*  
27 *reinhardtii* have been reported to date, we then used our disruptants, together with a *tua1*  
28 disruptant obtained from the *Chlamydomonas* Library Project (CLiP), to isolate novel  
29 tubulin-mutants resistant to the anti-tubulin agents propyzamide and oryzalin. As a result  
30 of several trials, we obtained 8 strains bearing 7 different  $\alpha$ -tubulin mutations and 24  
31 strains bearing 12 different  $\beta$ -tubulin mutations. Some of these mutations are known to  
32 confer drug resistance in human cancer cells. Thus, single-tubulin-gene disruptants are an  
33 efficient means of isolating novel *C. reinhardtii* tubulin mutants.

34

35 **IMPORTANCE:** *Chlamydomonas reinhardtii* is a useful organism for the study of tubulin  
36 function; however, only five kinds of tubulin mutations have been reported to date. This  
37 scarcity is partly due to *C. reinhardtii* possessing two tubulin genes each for  $\alpha$ - and  
38  $\beta$ -tubulin. Here, we obtained several strains in which one of the  $\alpha$ - or  $\beta$ -tubulin genes was  
39 disrupted, and then used those disruptants to isolate 32 strains bearing 19 mostly novel  
40 tubulin mutations that conferred differing degrees of resistance to two anti-tubulin  
41 compounds. The majority of the tubulin mutations were located outside of the drug-binding  
42 sites in the three-dimensional tubulin structure, suggesting that structural changes underlie

43 the drug resistance conferred by these mutations. Thus, single-tubulin-gene disruptants are  
44 an efficient means of generating tubulin mutants for the study of the structure–function  
45 relationship of tubulin and for the development of novel therapies based on anti-tubulin  
46 agents.

47

48 **Key Words:** microtubule, herbicide, anti-cancer drug

49

## 50 INTRODUCTION

51 Microtubules are fundamental cytoskeletal filaments that play pivotal roles in eukaryotic  
52 cell functions such as cell division, intra-cellular transport, cell shape development, and  
53 cilia and flagella assembly. Microtubules are produced by polymerization of  $\alpha/\beta$ -tubulin  
54 heterodimers. Most eukaryotic cells possess multiple genes encoding  $\alpha$ - and  $\beta$ -tubulin. For  
55 example, humans possess seven genes that encode  $\alpha$ -tubulin and eight genes that encode  
56  $\beta$ -tubulin, with each gene encoding a slightly different amino acid sequence. The presence  
57 of multiple genes for the two types of tubulin makes it difficult to study the properties of a  
58 particular tubulin species by genetic analysis, because the effects arising from mutation of  
59 one of the genes can be masked by the expression of the remaining intact genes.

60 The single-cell green alga *Chlamydomonas reinhardtii* is a useful experimental  
61 organism for studying tubulin function because it possesses a small number of tubulin  
62 genes and it produces microtubule-based organelles, flagella. In addition, there is a wide  
63 range of genetic tools available and a large amount of biological data has been  
64 accumulated for this species. In contrast to the majority of eukaryotes, *C. reinhardtii*  
65 possesses only two genes (*tua1* and *tua2*) encoding  $\alpha$ -tubulin and two genes (*tub1* and  
66 *tub2*) encoding  $\beta$ -tubulin (1, 2). The two genes for each type of tubulin encode the same  
67 amino acid sequence (2, 3), and the expression of all four genes is up-regulated after  
68 flagellar excision (4). Whether the two genes in each pair are expressed independently of  
69 each other has not yet been firmly established, but the genes do appear to be expressed  
70 indiscriminately during flagella formation (4).

71 Although *C. reinhardtii* possess only two genes for each tubulin, the presence of more  
72 than one gene expressing the same protein still makes it difficult to isolate tubulin mutants.

73 To date, only five kinds of tubulin mutations have been reported: a *tua1* mutation (Y24H)  
74 that confers amiprofos-methyl (APM) and oryzalin resistance (upA12) (3); two kinds of  
75 mutations in *tua2* (D205N and A208T) that confer colchicine hypersensitivity (*tua2-1* etc.,  
76 suppressors of *uni-3-1*, a mutant lacking  $\delta$ -tubulin) (5); and two mutations in *tub2* (K350E  
77 and K350M) that confer colchicine resistance (*col<sup>R</sup>4* and *col<sup>R</sup>15*) (6). APM, oryzalin,  
78 colchicine, and propyzamide are compounds that inhibit tubulin polymerization. These  
79 compounds other than colchicine inhibit plant tubulin polymerization at low concentrations  
80 and are used as herbicides.

81 Here, we isolated eight *tua2*, *tub1*, or *tub2* disruptants from an insertional library  
82 comprising around 8000 clones (7). We also obtained a *tua1* disruptant from the  
83 *Chlamydomonas* Library Project (CLiP) (8). We then used one of the *tub2* disruptants and  
84 two double-disruptants possessing only one  $\alpha$ -tubulin gene and one  $\beta$ -tubulin gene as  
85 parent strains for the production of 32 mutants showing various degrees of resistance to  
86 propyzamide and oryzalin. Thus, the use of single-tubulin-gene *C. reinhardtii* disruptants  
87 enabled efficient isolation of a large number of tubulin mutants resistant to anti-tubulin  
88 agents.

89

## 90 **RESULTS**

### 91 **Isolation of tubulin-gene disruptants**

92 A library of around 8000 clones was constructed by inserting the *aphVIII* gene cassette into  
93 the genome of *C. reinhardtii* (7). Then, the library was screened by PCR using primer pairs  
94 consisting of one primer targeting a consensus sequence of the four tubulin genes and  
95 another primer targeting the *aphVIII* fragment. As a result, we isolated eight tubulin gene  
96 disruptants: three showing *tua2* disruption (*tua2-A*, *tua2-B*, *tua2-C*), two showing *tub1*

97 disruption (*tub1-A*, *tub1-B*), and three showing *tub2* disruption (*tub2-A*, *tub2-B*, *tub2-C*).  
98 Fig. S1A shows the sites of the *aphVIII* cassette insertion in the eight disruptants, and Fig.  
99 S1B shows the PCR confirmation of the structure of the disrupted genes. In six of the  
100 disruptants (*tua2-A*, *tua2-B*, *tua2-C*, *tub1-B*, *tub2-A*, *tub2-C*), the *aphVIII* cassette was  
101 inserted into the gene. In the remaining two disruptants, the *aphVIII* cassette was inserted  
102 after the open reading frame (*tub1-A*) or within an intron (*tub2-B*). In all eight disruptants,  
103 *AphVIII* cassette insertion resulted in total disruption of mRNA expression of the affected  
104 tubulin gene, as confirmed by northern blot analysis (Fig. S2A). For *tua1-A*, *tua2-A*,  
105 *tub1-B*, and *tub2-A*, semi-quantitative real-time PCR was performed and again no  
106 expression of mRNA from the tubulin genes was detected (Fig. S2B).

107       None of the disruptants exhibited any apparent defects in growth rate (data not  
108 shown), tubulin expression (Fig. S2C), or flagellar regeneration after amputation (Fig.  
109 S2D), suggesting that the disruptants still produced sufficient  $\alpha/\beta$ -tubulin heterodimer for  
110 their cellular functions via the remaining intact genes. The mean flagellar length was  
111 comparable among the disruptants (see Fig. S2D). The five  $\beta$ -tubulin disruptants showed  
112 some difference in their sensitivity to colchicine: *tub1-A* and *tub1-B* showed stronger  
113 resistance while *tub2-A* showed weaker resistance than wild type (Fig. 1), although the  
114 sensitivity somewhat varied among alleles (Fig. 1).

115

### 116 **Mutant isolation using tubulin-gene disruptants**

117 Next, we used the disruptants to isolate *C. reinhardtii* strains expressing tubulins with  
118 missense mutations. Three parent strains were used: *tub2-A*, a double disruptant generated  
119 by crossing *tua1-A* with *tub1-B*, and a double disruptant generated by crossing *tua2-A* and  
120 *tub1-B*. As a result of 1-3 trials with each parental strain against oryzalin or propyzamide,

121 32 strains showing a total of 19 different tubulin missense mutations were isolated. Table 1  
122 shows the obtained mutants classified by the gene affected, as well as the results of a  
123 qualitative assessment of each strain's resistance to oryzalin and propyzamide. Most of the  
124 oryzalin-resistant strains, as well as a propyzamide-resistant mutant (*pyz532*), had a  
125 missense mutation in an  $\alpha$ -tubulin gene. In contrast, most of the propyzamide-resistant  
126 strains, other than *pyz532*, had mutations in a  $\beta$ -tubulin gene.

127 Figure 2 shows a predicted three-dimensional structure of *C. reinhardtii*  $\alpha/\beta$ -tubulin  
128 heterodimer labeled with the site of each missense mutation reported here and in previous  
129 studies (3, 5, 6). Five of the isolates had mutations that have been reported previously: *ory2*  
130 had a *tua1* Y24H mutation as did upA12 (3); *pyz8*, *pyz9*, and *pyz523* had a *tub2* K350E  
131 mutation as did *col<sup>R</sup>4* (6); and *pyz6* had a *tub2* K350M mutation as did *col<sup>R</sup>15* (6). The five  
132 mutants isolated in the present study exhibited stronger drug-resistance than the three  
133 previously reported mutants (data not shown). This stronger drug-resistance may reflect the  
134 fact that the mutants isolated here express only mutated  $\alpha$ - or  $\beta$ -tubulin from a single gene,  
135 whereas previously reported mutants express a mutated tubulin together with a wild-type  
136 counterpart.

137 Some of the identified mutations involved the substitution of amino acids with  
138 different charges. For example, the propyzamide-resistant missense strains *pyz2/pyz524*,  
139 *pyz503*, and *pyz530/pyz534/pyz502/pyz525/pyz526/pyz527* expressed  $\beta$ -tubulins with the  
140 mutations Q134H, E198L, and E198K, respectively. The isoelectric point (pI) values of  
141 these  $\beta$ -tubulins predicted from their amino acid sequences were 4.59, 4.58, and 4.63,  
142 respectively, which were greater than the pI of wild-type  $\beta$ -tubulin (4.55). We confirmed  
143 the expression of  $\beta$ -tubulins with different pIs in those strains by two-dimensional

144 polyacrylamide gel electrophoresis (2D-PAGE) of axonemal proteins from the mutants and  
145 wild type (Fig. 2). As expected, the spot of  $\beta$ -tubulin appeared at higher pH values in the  
146 order *pyz530* (E198K) > *pyz2* (Q134H) > *pyz503* (E198L) > wild type. The 2D-PAGE  
147 analysis also verified that each mutant expressed  $\beta$ -tubulin from only a single gene, since it  
148 detected no  $\beta$ -tubulin spots with the wild-type pI in mutant samples.

149

### 150 **Novel tubulin mutant strains exhibited various sensitivities to anti-tubulin agents**

151 The mutant strains displayed various patterns of sensitivity to anti-tubulin agents (Table 1,  
152 Fig. 1). Several strains showed high oryzalin resistance in the order *ory304* > *ory3* >  
153 *ory205* > *ory313* > *ory314*. Three of these strains also showed hypersensitivity to  
154 propyzamide in the order *ory304* > *ory205* > *ory3*, and one of these strains, *ory205*, was  
155 also hypersensitive to colchicine. Several strains (*pyz2*, *pyz501*, *pyz503*, *pyz506*, *pyz513*,  
156 *pyz529*, *pyz530*, and *pyz532*) showed strong propyzamide resistance, remaining viable on a  
157 Tris–acetate–phosphate (TAP) agar plate containing more than 400  $\mu$ M propyzamide  
158 whereas wild-type *C. reinhardtii* (CC-125) was barely viable at 40  $\mu$ M. Of these eight  
159 mutant strains, three showed hypersensitivity to colchicine (*pyz532* > *pyz503* > *pyz2*) and  
160 the remaining five showed resistance to colchicine (*pyz529*, *pyz513*, *pyz530*, *pyz501*, and  
161 *pyz506*). The different sensitivities to colchicine and propyzamide in these mutants are  
162 interesting because the two agents bind to almost the same position on the tubulin  
163 heterodimer (9). Four of the eight propyzamide-resistant mutants exhibited oryzalin  
164 resistance in the order *pyz530* > *pyz513* > *pyz2* > *pyz532*, and two, *pyz501* and *pyz529*,  
165 were hypersensitive to oryzalin.

166

### 167 **DISCUSSION**



168 By screening an *AphVIII* insertional library, we isolated three disruptants lacking *tua2*, two  
169 lacking *tub1*, and three lacking *tub2*. All were most likely null mutants (Fig. S2A).  
170 Although these disruptants lacked one of their tubulin-encoding genes, their cytoplasmic  
171 tubulin levels remained normal (Fig. S2C), suggesting the presence of an auto-regulatory  
172 mechanism that maintains the tubulin mRNA level, as observed in other eukaryotic cells  
173 (10). Indeed, in *tua1-A*, *tub1-B*, and *tub2-A*, the mRNA expression level of the remaining  
174  $\alpha$ - or  $\beta$ -tubulin gene was increased approximately 2-fold compared with wild type (Fig.  
175 S2B). Also, flagellar length, ability to produce flagella after amputation (Fig. S2D), and  
176 overall cell growth rate did not noticeably differ from the wild-type growth rate (data not  
177 shown). Thus, although *C. reinhardtii* possesses two  $\alpha$ -tubulin genes and two  $\beta$ -tubulin  
178 genes, a single gene for each type is enough to supply the tubulin necessary for its cellular  
179 functions. However, it should be noted that the present findings do not mean that the two  
180 genes for each tubulin have exactly the same function; rather, the two genes may differ  
181 from each other in a subtle manner. For example, we observed that whereas the *tub1*  
182 disruptants were resistant to colchicine, the *tub2* disruptants were sensitive although some  
183 allele-specific variation was observed (Fig. 1). This suggests that there is some difference  
184 in the regulation of gene expression that is dependent on the concentration of free tubulin  
185 in the cytoplasm (11). Thus, how the two genes encoding the two tubulins differ in their  
186 function and regulation warrants further investigation, and our single-tubulin-gene mutants  
187 established here should be useful for such investigations.

188 Next, we used the disruptants to obtain mutants with resistance to two anti-tubulin  
189 agents, propyzamide and oryzalin. Several rounds of trials to isolate mutants resistant to  
190 one or both of the agents afforded 8 mutants with 7 different  $\alpha$ -tubulin gene missense  
191 mutations and 24 mutants with 12 different  $\beta$ -tubulin gene missense mutations. The

192 number of mutations obtained was much larger than the total number that has been  
193 reported previously (i.e., 3 kinds of  $\alpha$ -tubulin mutations and 2 kinds of  $\beta$ -tubulin  
194 mutations)(3, 5, 6). In addition, we found that about one-third of the colonies picked from  
195 the screening plates harbored a mutation in a tubulin gene (data not shown). Together,  
196 these findings suggest that our approach of using single-tubulin-gene disruptants is a  
197 highly efficient means of obtaining tubulin mutant strains.

198       How the sensitivity to anti-tubulin agents varied in the mutants is an important issue  
199 that warrants clarification. Some of the tubulin mutants that conferred resistance to the  
200 anti-tubulin agents had a mutation near to where the anti-tubulin agents bind to the  
201  $\alpha/\beta$ -tubulin heterodimer (Fig. 3). The binding site of oryzalin, inferred from that of an  
202 analogous compound, tubulysin M, is at the intra-dimer interface (12) close to the  
203  $\alpha$ -tubulin mutation F351L (in strain *pyz532*). Other *ory* mutants whose mutation sites  
204 occur independently of the tubulysin M-binding site may confer oryzalin resistance by  
205 modulating the three-dimensional structure of  $\alpha$ -tubulin. Likewise, a propyzamide-like  
206 compound, 2RR, is known to bind at the inter-dimer interface (13) close to several of the  
207 identified  $\beta$ -tubulin mutation sites: E198K/L (in  
208 *pyz530/pyz534/pyz502/pyz525/pyz526/pyz527* and *pyz503*), I236N (in *pyz513*),  
209 K350N/E/M (in *pyz528*, *col<sup>R</sup>4/pyz8/pyz9/pyz523*, and *col<sup>R</sup>15/pyz6*), and I368F (in  
210 *pyz501/pyz504/pyz514/pyz535*). Other mutations may confer propyzamide resistance  
211 through some structural change in  $\alpha/\beta$ -tubulin. Another interesting observation is that the  
212  $\beta$ -tubulin mutation E198K conferred colchicine resistance whereas the E198L mutation  
213 conferred high colchicine sensitivity. This suggests that the electric charge of E198 is a  
214 critical determinant of colchicine sensitivity.

215 Several of the mutations detected in the present study are similar to those reported in  
216 other organisms (Table S1). For  $\alpha$ -tubulin, mutation F49C in *ory314*, F52L in *ory3*, and  
217 S165A in *ory205/ory505* have been reported in a *Toxoplasma gondii* oryzalin-resistant  
218 mutants (14, 15). For  $\beta$ -tubulin, mutation Q134H in *pyz2/pyz524* has been reported in a  
219 *Beauveria bassiana* benzimidazole-resistant mutant (16); mutations E198K/L in  
220 *pyz530/pyz534/pyz502/pyz525/pyz526/pyz527* and *pyz503* are found in fungi and  
221 nematodes that confer benzimidazole resistance and phenylcarbamate hypersensitivities  
222 (17-22); I236N in *pyz513* corresponded to the mutation responsible for resistance to the  
223 anti-cancer drug 2-methoxyestradiol in human epithelial cancer cells (23); K350N in  
224 *pyz528* corresponded to the mutations responsible for colcemid and vinblastine resistance  
225 in Chinese hamster ovary (CHO) cells (24) and indanocine resistance in human leukemia  
226 cells (25). Mutations Y24N, F138V, and F351L in  $\alpha$ -tubulin (*ory304*, *ory313*, and *pyz532*)  
227 and mutations L165Q, F266C and I368F in  $\beta$ -tubulin (*pyz506*,  
228 *pyz529/pyz531/pyz533/pyz536*, and *pyz501/pyz504/pyz514/pyz535*) are being reported here  
229 for the first time; further investigations are needed to examine whether these mutations are  
230 responsible for altered drug sensitivity in other organisms.

231 Although the present study selected mutants based only on their resistance to two  
232 anti-tubulin agents, use of other agents such as the microtubule-stabilizing agent paclitaxel,  
233 or screening for other properties such as hypersensitivity to drugs, resistance to low  
234 temperature, or deficiency in flagellar formation and motility will lead to the isolation of a  
235 greater variety of mutants. Detailed analyses of many such mutants will deepen our  
236 understanding of the structure–function relation of tubulins. Since some of the tubulin  
237 mutations identified in the present study corresponded to mutations found in human  
238 tubulins that confer drug resistance in cancer cells, we expect that studies of

239 *Chlamydomonas* tubulin mutants will contribute to the development of improved cancer

240 therapies.

241

## 242 MATERIALS AND METHODS

### 243 Isolation of tubulin-gene disruptants

244 Eight tubulin-gene disruptants were isolated from a library of mutants generated by  
245 inserting the *aphVIII* gene (paromomycin resistance gene) into the genome of *C.*  
246 *reinhardtii* (7). Disruptants *tua2-B*, *tua2-C*, *tub1-B*, *tub2-A*, *tub2-B*, and *tub2-C* were  
247 isolated by performing PCR on the pooled transformants using primers targeting the  
248 *aphVIII* sequence (PSI103-F2 and RB02) and two tubulin consensus sequences  
249 (3'-Tus1891g and 3'-Tus1803g). A disruptant, *tub1-A*, was isolated using two alternative  
250 tubulin consensus primers (5'-Tus1082c and 5'-Tus1596g). A disruptant, *tua2-A*, was  
251 isolated using RB02 and an alternative consensus primer (3'-TuA2-3254g). Supplementary  
252 Information 1 shows the primers used in the present study. After screening, the disruptants  
253 were sequenced in the vicinity of their disrupted tubulin gene (Macrogen Japan Co.,  
254 Japan).

255 In addition, a *tua1* disruptant (LMJ.RY0402.158052; referred to as *tua1-A* in the  
256 present study) was obtained from the *Chlamydomonas* Library Project (8); this disruptant  
257 has a long insertion composed of two facing paromomycin-resistant CIB1 cassettes  
258 immediately before the stop codon in *tua1*.

259 The disruptants were backcrossed with wild-type *C. reinhardtii* (CC-125) and  
260 selected for tubulin-gene disruption by PCR before use. Double disruptants were  
261 constructed by standard methods (26), and selected from tetrads by PCR analysis.

262

### 263 Isolation of anti-tubulin drug resistant mutants

264 *C. reinhardtii* strains whose *tub1* or *tub2* was disrupted with or without *tua2* disruption  
265 were grown to the mid-log phase and then irradiated by ultraviolet light until about 50% of

266 the cells were killed. The culture was spread on TAP-agar plates containing 20  $\mu$ M  
267 propyzamide or 10  $\mu$ M oryzalin, kept in the dark for 12 h, and then incubated under light  
268 for 5–10 days. Colonies that appeared were transferred to liquid TAP medium in 96-well  
269 plates containing the same concentration of propyzamide or oryzalin. From each culture  
270 that grew, genomic DNA was extracted and subjected to PCR using the following primers:  
271 5'-ChlaTuA1\_long969 and 3'-TuA6260 (for *tua1*), 5'-Tua2-10g and 3'-TuA2-3288g (for  
272 *tua2*), 5'-tub1-33c and 3'-tub1-1667c (for *tub1*), and 5'-EcoTuB2-upper and  
273 3'-XhoTuB2-lower (for *tub2*). The PCR products were processed for DNA sequencing  
274 (Macrogen Japan Co.).

275

#### 276 **Drug-resistance test**

277 *C. reinhardtii* strains were grown in liquid TAP medium until the mid-log phase, and then  
278 diluted or concentrated to  $5 \times 10^6$  cells/mL. Then, 3  $\mu$ L of culture was spotted on a  
279 TAP-agar plate containing Propyzamide Reference Material (0–400  $\mu$ M), Oryzalin  
280 Standard (0–40  $\mu$ M), or colchicine (0–8000  $\mu$ M) (all from Fujifilm Wako Pure Chemical  
281 Co., Japan) and cultured for a week at 26°C under 12-h light/12-h dark conditions. A  
282 wild-type strain (CC-125) and a colchicine-resistant mutant strain (*col<sup>R</sup>4* (6)) were used as  
283 references.

284

#### 285 **Three-dimensional structure prediction of *C. reinhardtii* $\alpha/\beta$ -tubulin heterodimer**

286 The three-dimensional structure of the *C. reinhardtii*  $\alpha/\beta$ -tubulin heterodimer was  
287 predicted by using FAMS software (27) based on a known tubulin tetramer structure  
288 obtained from the Protein Data Bank (PDB ID: 1Z2B (28)). To determine the amino acids

289 that most likely interacted with the examined drugs, *in silico* molecular docking analyses  
290 were performed using the ChooseLD program (29).

291

## 292 **2D-PAGE of isolated axonemes**

293 Axonemes were isolated from the *C. reinhardtii* strains by using standard procedures (30).

294 A small aliquot of axonemal precipitate (~2 or 10  $\mu$ g) was extracted with a buffer

295 containing 5 M urea and 2 M thiourea and analyzed by 2D-PAGE as described previously

296 (31). Since  $\alpha$ - and  $\beta$ -tubulin are modified post-translationally, the loading amount was

297 adjusted so that their major forms only were detectable by silver staining. The predicted pI

298 values of the wild-type and mutant tubulins were calculated by using the EMBOSS

299 database and the Sequence Manipulation Suite, which is a collection of JavaScript

300 programs for examining short protein sequences

301 ([https://www.bioinformatics.org/sms2/protein\\_iep.html](https://www.bioinformatics.org/sms2/protein_iep.html)) (32).

302

303 **ACKNOWLEDGMENTS**

304 We thank Ms. Ai Tashiro, Haruka Fujisawa, and Tomoko Kurihara (Chuo University,  
305 Tokyo, Japan) for conducting the tubulin disruptant screening, and Ryosuke Suzuki,  
306 Hinano Sugai, Mami Ishigaki, and Yidong Tang (Chuo University) for performing the  
307 gene analysis of the tubulin mutants. We also thank Dr. Mitsuo Iwadate (Chuo University)  
308 for conducting the three-dimensional structure prediction and in silico molecular docking  
309 analyses, and Dr. Hiroko Kawai-Toyooka (The Univ. of Tokyo, Tokyo, Japan) for her  
310 technical support with the real-time polymerase chain reaction analyses.

311

312 **COMPETING INTERESTS**

313 The authors have no competing interests to declare.

314

315 **Funding**

316 This study was supported by grants from Chuo University (Joint Research Grant and Grant  
317 for Special Research).

318

319

320 **AUTHOR CONTRIBUTIONS**

321 TKM and RK designed and conducted the research and wrote the paper. YO performed the  
322 real-time polymerase chain reaction analysis. TY and HF produced a temporal library of  
323 *Chlamydomonas reinhardtii* carrying the *aphVIII* gene.

324





326

## REFERENCES

327

- 328 1. Silflow CD, Chisholm RL, Conner TW, Ranum LP. 1985. The two  
329 alpha-tubulin genes of *Chlamydomonas reinhardi* code for slightly  
330 different proteins. *Mol Cell Biol* 5:2389–2398.
- 331 2. Youngblom J, Schloss JA, Silflow CD. 1984. The two beta-tubulin genes  
332 of *Chlamydomonas reinhardtii* code for identical proteins. *Mol Cell Biol*  
333 4:2686–2696.
- 334 3. James SW, Silflow CD, Stroom P, Lefebvre PA. 1993. A mutation in the  
335  $\alpha 1$ -tubulin gene of *Chlamydomonas reinhardtii* confers resistance to  
336 anti-microtubule herbicides. *J Cell Sci*:209–218.
- 337 4. Brunke KJ, Young EE, Buchbinder BU, Weeks DP. 1982. Coordinate  
338 regulation of the four tubulin genes of *Chlamydomonas reinhardi*.  
339 *Nucleic Acids Res* 10:1295–1310.
- 340 5. Fromherz S, Giddings TH, Jr., Gomez-Ospina N, Dutcher SK. 2004.  
341 Mutations in alpha-tubulin promote basal body maturation and flagellar  
342 assembly in the absence of delta-tubulin. *J Cell Sci* 117:303–314.
- 343 6. Lee VD, Huang B. 1990. Missense mutations at lysine 350 in beta  
344 2-tubulin confer altered sensitivity to microtubule inhibitors in  
345 *Chlamydomonas*. *Plant Cell* 2:1051–1057.
- 346 7. Yamano T, Sato E, Iguchi H, Fukuda Y, Fukuzawa H. 2015.  
347 Characterization of cooperative bicarbonate uptake into chloroplast  
348 stroma in the green alga *Chlamydomonas reinhardtii*. *Proc Natl Acad Sci*  
349 *USA* 112:7315–7320.
- 350 8. Li X, Zhang R, Patena W, Gang SS, Blum SR, Ivanova N, Yue R,  
351 Robertson JM, Lefebvre PA, Fitz-Gibbon ST, Grossman AR, Jonikas MC.  
352 2016. An indexed, mapped mutant library enables reverse genetics  
353 studies of biological processes in *Chlamydomonas reinhardtii*. *Plant Cell*  
354 28:367–387.
- 355 9. Silflow CD, Sun X, Haas NA, Foley JW, Lefebvre PA. 2011. The Hsp70  
356 and Hsp40 chaperones influence microtubule stability in  
357 *Chlamydomonas*. *Genetics* 189:1249–1260.

- 358 10. Cleveland DW, Havercroft JC. 1983. Is apparent autoregulatory control  
359 of tubulin synthesis nontranscriptionally regulated? *J Cell Biol* 97:919–  
360 924.
- 361 11. Cleveland DW, Lopata MA, Sherline P, Kirschner MW. 1981.  
362 Unpolymerized tubulin modulates the level of tubulin mRNAs. *Cell*  
363 25:537–546.
- 364 12. Wang Y, Benz FW, Wu Y, Wang Q, Chen Y, Chen X, Li H, Zhang Y, Zhang  
365 R, Yang J. 2016. Structural insights into the pharmacophore of vinca  
366 domain inhibitors of microtubules. *Mol Pharmacol* 89:233–242.
- 367 13. Prota AE, Danel F, Bachmann F, Bargsten K, Buey RM, Pohlmann J,  
368 Reinelt S, Lane H, Steinmetz MO. 2014. The novel  
369 microtubule-destabilizing drug BAL27862 binds to the colchicine site of  
370 tubulin with distinct effects on microtubule organization. *J Mol Biol*  
371 426:1848–1860.
- 372 14. Morrissette NS, Mitra A, Sept D, Sibley LD. 2004. Dinitroanilines bind  
373 alpha-tubulin to disrupt microtubules. *Mol Biol Cell* 15:1960–1968.
- 374 15. Ma C, Li C, Ganesan L, Oak J, Tsai S, Sept D, Morrissette NS. 2007.  
375 Mutations in alpha-tubulin confer dinitroaniline resistance at a cost to  
376 microtubule function. *Mol Biol Cell* 18:4711–4720.
- 377 16. Zou G, Ying SH, Shen ZC, Feng MG. 2006. Multi-sited mutations of  
378 beta-tubulin are involved in benzimidazole resistance and  
379 thermotolerance of fungal biocontrol agent *Beauveria bassiana*. *Environ*  
380 *Microbiol* 8:2096–2105.
- 381 17. Jung MK, Wilder IB, Oakley BR. 1992. Amino acid alterations in the  
382 benA (beta-tubulin) gene of *Aspergillus nidulans* that confer benomyl  
383 resistance. *Cell Motil Cytoskel* 22:170–174.
- 384 18. Cai M, Lin D, Chen L, Bi Y, Xiao L, Liu XL. 2015. M233I mutation in the  
385 beta-tubulin of *Botrytis cinerea* confers resistance to zoxamide. *Sci Rep*  
386 5:16881.
- 387 19. Wright AJ, Hunter CP. 2003. Mutations in a beta-tubulin disrupt spindle  
388 orientation and microtubule dynamics in the early *Caenorhabditis*  
389 *elegans* embryo. *Mol Biol Cell* 14:4512–4525.
- 390 20. Buhr TL, Dickman MB. 1994. Isolation, characterization, and expression

- 391 of a second beta-tubulin-encoding gene from *Colletotrichum*  
392 *gloeosporioides* f. sp. *aeschynomene*. Appl Environ Microbiol 60:4155–  
393 4159.
- 394 21. Fujimura M, Kamakura T, Inoue H, Yamaguchi I. 1994. Amino-acid  
395 alterations in the beta-tubulin gene of *Neurospora crassa* that confer  
396 resistance to carbendazim and diethofencarb. Curr Genet 25:418–422.
- 397 22. Chen CJ, Yu JJ, Bi CW, Zhang YN, Xu JQ, Wang JX, Zhou MG. 2009.  
398 Mutations in a beta-tubulin confer resistance of *Gibberella zeae* to  
399 benzimidazole fungicides. Phytopathology 99:1403–1411.
- 400 23. Escuin D, Burke PA, McMahon-Tobin G, Hembrough T, Wang Y, Alcaraz  
401 AA, Leandro-Garcia LJ, Rodriguez-Antona C, Snyder JP, Lavallee TM,  
402 Giannakakou P. 2009. The hematopoietic-specific beta1-tubulin is  
403 naturally resistant to 2-methoxyestradiol and protects patients from  
404 drug-induced myelosuppression. Cell Cycle 8:3914–3924.
- 405 24. Hari M, Wang Y, Veeraraghavan S, Cabral F. 2003. Mutations in alpha-  
406 and beta-tubulin that stabilize microtubules and confer resistance to  
407 colcemid and vinblastine. Mol Cancer Ther 2:597–605.
- 408 25. Hua XH, Genini D, Gussio R, Tawatao R, Shih H, Kipps TJ, Carson DA,  
409 Leoni LM. 2001. Biochemical genetic analysis of indanocine resistance in  
410 human leukemia. Cancer Res 61:7248–7254.
- 411 26. Harris EH, Stern DB, Witman GB. 2009. The *Chlamydomonas*  
412 sourcebook, vol 1. Elsevier San Diego, CA.
- 413 27. Umeyama H, Iwadate M. 2004. FAMS and FAMSBASE for protein  
414 structure. Curr Protoc Bioinformatics Chapter 5:Unit5 2.
- 415 28. Gigant B, Wang C, Ravelli RB, Roussi F, Steinmetz MO, Curmi PA, Sobel  
416 A, Knossow M. 2005. Structural basis for the regulation of tubulin by  
417 vinblastine. Nature 435:519–522.
- 418 29. Takaya D, Takeda-Shitaka M, Terashi G, Kanou K, Iwadate M,  
419 Umeyama H. 2008. Bioinformatics based Ligand-Docking and in-silico  
420 screening. Chem Pharm Bull (Tokyo) 56:742–744.
- 421 30. Witman GB. 1986. Isolation of *Chlamydomonas* flagella and flagellar  
422 axonemes. Methods Enzymol 134:280–290.
- 423 31. Kato-Minoura T, Hirono M, Kamiya R. 1997. *Chlamydomonas* inner-arm

- 424 dynein mutant, *ida5*, has a mutation in an actin-encoding gene. *J Cell*  
425 *Biol* 137:649–656.
- 426 32. Stothard P. 2000. The sequence manipulation suite: JavaScript programs  
427 for analyzing and formatting protein and DNA sequences. *Biotechniques*  
428 28:1102, 1104.
- 429 33. Gokmen-Polar Y, Escuin D, Walls CD, Soule SE, Wang Y, Sanders KL,  
430 Lavallee TM, Wang M, Guenther BD, Giannakakou P, Sledge GW, Jr.  
431 2005. beta-tubulin mutations are associated with resistance to  
432 2-methoxyestradiol in MDA-MB-435 cancer cells. *Cancer Res* 65:9406–  
433 9414.  
434
- 435

436  
437

**Table 1** Tubulin missense mutants isolated in this study.

| Gene altered | Strain                                | Mutation (DNA) | Mutation (protein) | Resistance to |             |            |
|--------------|---------------------------------------|----------------|--------------------|---------------|-------------|------------|
|              |                                       |                |                    | oryzalin      | propyzamide | colchicine |
| <i>tua1</i>  | <i>ory2</i>                           | TAC->CAC       | Y24H               | +++           | +/-         | +/-        |
|              | <i>ory3</i>                           | TTC->CTC       | F52L               | ++++          | --          | +          |
|              | <i>ory205, ory505</i>                 | TCC->GCC       | S165A              | ++++          | --          | --         |
|              | <i>pyz532</i>                         | TTC->TTA       | F351L              | +             | +++         | ---        |
| <i>tua2</i>  | <i>ory304</i>                         | TAC->AAC       | Y24N               | ++++          | ---         | +/-        |
|              | <i>ory314</i>                         | TTC->TGC       | F49C               | +++           | -           | +/-        |
|              | <i>ory313</i>                         | TTC->GTC       | F138V              | ++++          | +/-         | +/-        |
| <i>tub1</i>  | <i>pyz530, pyz534</i>                 | GAG->AAG       | E198K              | +++           | +++         | ++         |
|              | <i>pyz529, pyz531, pyz533</i>         | TTC->TGC       | F266C              | ---           | +++         | +++        |
| <i>tub2</i>  | <i>pyz2, 524</i>                      | CAG->CAT       | Q134H              | ++            | +++         | -          |
|              | <i>pyz506</i>                         | CTG->CAG       | L165Q              | +/-           | +++         | +          |
|              | <i>pyz502, pyz525, pyz526, pyz527</i> | GAG->AAG       | E198K              | N.E.          | N.E.        | N.E.       |
|              | <i>pyz503</i>                         | GAG->TTG       | E198L              | +/-           | +++         | --         |
|              | <i>pyz513</i>                         | ATC->AAT       | I236N*             | +++           | +++         | +++        |
|              | <i>pyz536</i>                         | TTC->TGC       | F266C              | N. E.         | N.E.        | N.E.       |
|              | <i>pyz8, pyz9, pyz523</i>             | AAG->GAG       | K350E              | +             | +           | ++++       |
|              | <i>pyz6</i>                           | AAG->ATG       | K350M              | N.E.          | N.E.        | N.E.       |
|              | <i>pyz528</i>                         | AAG->AAT       | K350N**            | N.E.          | N.E.        | N.E.       |
|              | <i>pyz501, pyz504, pyz514, pyz535</i> | ATC->TTC       | I368F              | ---           | +++         | +          |

438 N.E., not examined; +, resistant; -, sensitive; +/-, wild-type level. The number of + and -  
 439 symbols represents the qualitative difference among the strains. \*, mutation found in  
 440 human cancer cells resistant to 2-methoxyestradiol(23).\*\*, mutation found in human  
 441 cancer cells resistant to indanocine and 2-methoxyestradiol(25, 33).

442 **Figure 1.** Drug sensitivities of tubulin-gene disruptants and missense mutant strains.  
443 Cell growth on TAP agar plates containing different concentrations of anti-tubulin drugs.  
444 Three plates each inoculated with nine strains were used for each condition, as summarized  
445 in panel (A). Sensitivity to colchicine (B), oryzalin (C), and propyzamide (D) was  
446 examined.

447

448 **Figure 2.** Two-dimensional polyacrylamide gel electrophoresis analysis of axonemes from  
449 strains *pyz2*, *pyz503*, and *pyz530*.

450 Protein extracts of axonemes of wild type (CC-125), *pyz2*, *pyz503*, and *pyz530* were loaded  
451 on a two-dimensional polyacrylamide gel and stained with silver. pH range: 4.0–7.0. (A)  
452 Electrophoresis pattern of wild-type axoneme (~10  $\mu$ g loaded). (B) Portions of  
453 polyacrylamide gels showing the major spots of  $\alpha$ - and  $\beta$ -tubulin. Upper panel shows a  
454 close-up of the area indicated by the box in (A). The lower four panels show the  
455 polyacrylamide gels after loading approximately 2  $\mu$ g of axoneme. The predicted pIs of the  
456 wild-type and three mutant  $\alpha$ - and  $\beta$ -tubulins are indicated to the right of the panels.

457

458 **Figure 3.** Predicted three-dimensional structure of *Chlamydomonas reinhardtii*  
459  $\alpha/\beta$ -tubulin heterodimer showing the mutations reported in the present and previous  
460 studies.

461 Light gray,  $\alpha$ -tubulin; dark gray,  $\beta$ -tubulin. Altered amino acids are shown as sphere  
462 representations. The binding sites of tubulysin M (red, an oryzalin-like compound) and  
463 2RR (blue,

464 3-[(4-{1-[2-(4-aminophenyl)-2-oxoethyl]-1H-benzimidazol-2-yl}-1,2,5-oxadiazol-3-yl)a

465 mino]propanenitrile, a propyzamide-like compound) were determined by applying the  
466 alignment command in MacPyMol software to the tubulin structures 4ZOL and 4O2A  
467 reported in the presence of these compounds (12, 13). The orange stick representations  
468 show GTP (in  $\alpha$ -tubulin) and GDP (in  $\beta$ -tubulin). Mutations identical to previously  
469 reported mutations are marked with asterisks: \*, (3); \*\*, (5); and \*\*\*, (6).

470

471



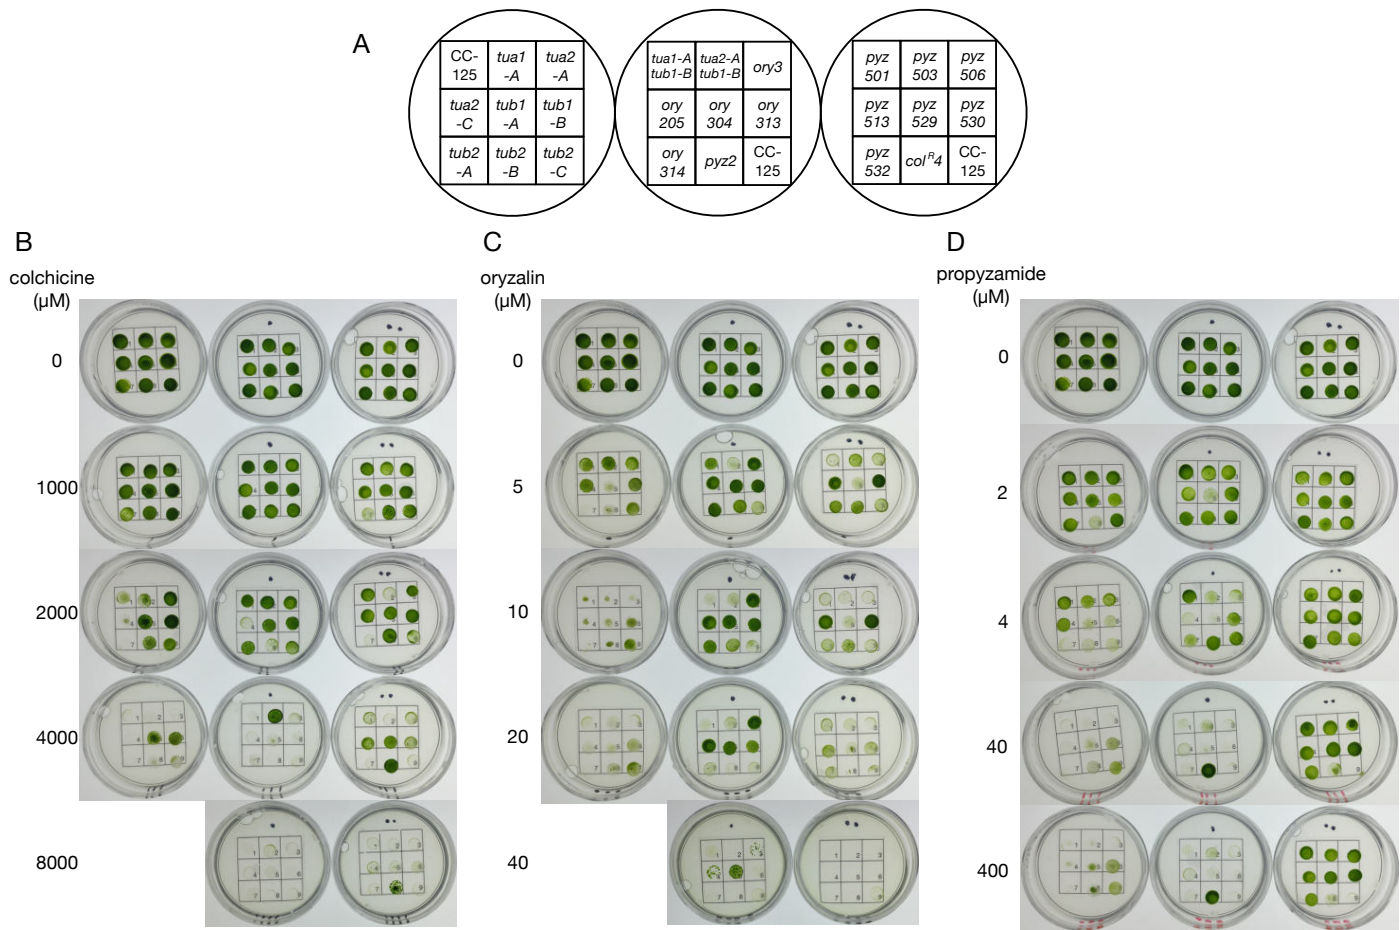

Figure 1  
Kato-Minoura, T. et al.

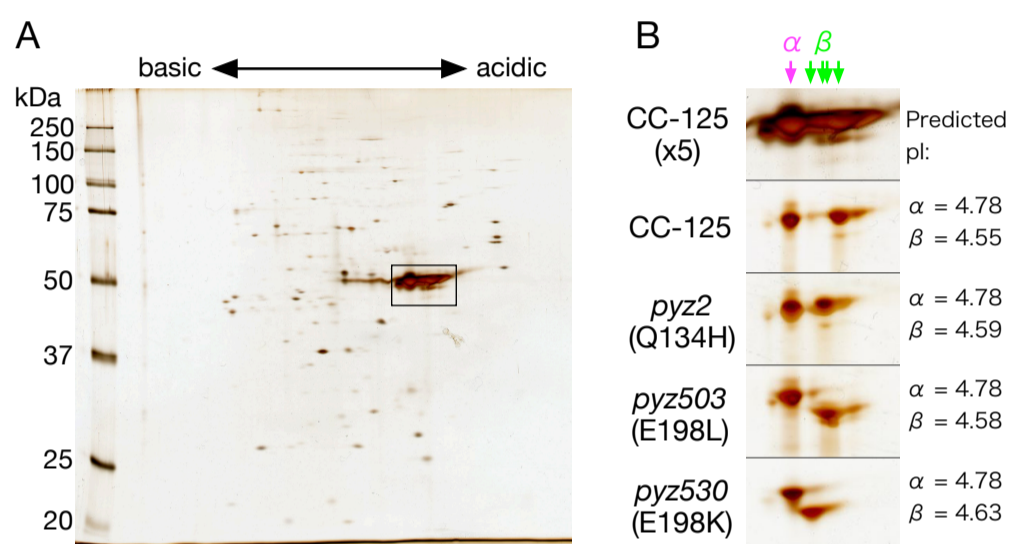

Figure 2  
Kato-Minoura, T et al.

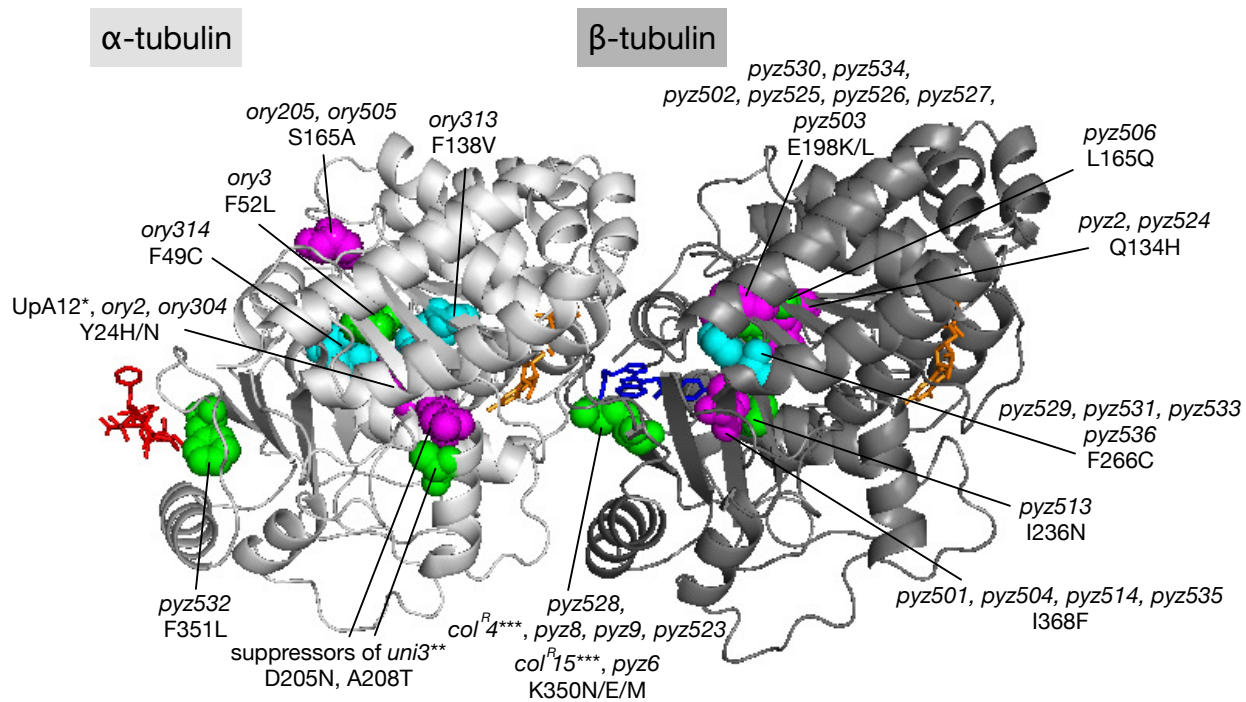

Figure 3  
Kato-Minoura, T. et al.
